# Supplementary material for: Smallholder Farmers’ Perceived Climate-Related Risk, Impact, and Their Choices of Sustainable Adaptation Strategies
Source: MDPI journal article supplement (doi:10.3390/su132111922), 2021-10-28
Supplement: s1 [file s1]

## Questionnaire

On

### Smallholder Farmers' Perceived Climate-Related Risk, Impact, and Their Choices of Sustainable Adaptation Strategies

Date: -----/-----/-----

Village:

Union:

Upazila:

Zila:

#### A. Demographic and Farm Characteristics of the Respondents

1. Name of the respondent: \_\_\_\_\_
2. Age (years): (1). <30 (2). 30-40 (3). 41-50 (4). >50
3. Gender: 1. Male 2. Female
4. Marital status: 1. Married 2. Single 3. Divorce 4. other
5. Education Level: 0. Illiterate 1. Primary 2. Secondary 3. Higher-secondary 4. Graduation  
5. Post-graduation
6. The number of members in your family: 1. Three 2. Four 3. Five 4. Six 5. >Six
7. Do you engage with other occupations? 1. Yes 0. No
8. Income source: 1. Farm 2. Non-Farm 3. others
9. The numbers of earning members in your family: 1. One 2. Two 3. Three 4. more
10. Monthly income level in USD\$: 1. low (~ 35.29) 2. Lower middle (35.29-47.05) 3. Upper middle (47.05-70.58) 4. High (above 70.78).
11. Land ownership types: 1. Own 2. Hire 3. Joint venture family
12. Farm experiences (practice) in years: 1. <20 years 2. 20-30 years 3. >30 years
13. Land preparation: 1. Use tractor 2. Use both tractors and bullocks 3. Others
14. Plowing per year: 1. Once 2. Twice 3. Three and more
15. Irrigation sources: 1. Canal 2. Deep tube well 3. Rain Fed 4. Both deep tube -well & Rain-fed 5. River
16. Incidence of irrigation: 1. Nil 2. Weekly 3. Twice a month 4. Three times a month 5. Monthly
17. Getting information on climate change: 1. Yes 0. No
18. Source of getting climate change information: 1. Media 2. Village elders 3. Own view 4. Friends and relatives 5. Don't know

**B. Farmers' perceptions of meteorological change over the last 25 years and perception on flood and drought.**

1. What do your perception of the temperature and drought in the region?
2. What do your opinion about floods and drought in the region?

| Perceptions<br>Variable | 1. Increasing | 2. Decreasing | 3. No change | 4. Do not know |
|-------------------------|---------------|---------------|--------------|----------------|
| Temperature             |               |               |              |                |
| Rainfall                |               |               |              |                |
| Flood                   |               |               |              |                |
| Drought                 |               |               |              |                |

**C. Farmers' perceptions about climate change risks, impacts and it level of severity.**

1. How adversely below these climatic risks are occurring in your area? Please mention your valuable opinion.

| Sl<br>no | Climate change<br>induce hazards | Likert scale |             |        |           |         |              |
|----------|----------------------------------|--------------|-------------|--------|-----------|---------|--------------|
|          |                                  | 1. No        | 2. Very low | 3. Low | 4. Medium | 5. High | 6. Very high |
| 1        | Drought                          |              |             |        |           |         |              |
| 2        | Flood                            |              |             |        |           |         |              |
| 3        | Heat wave                        |              |             |        |           |         |              |
| 4        | Lightening                       |              |             |        |           |         |              |
| 5        | Heavy storm                      |              |             |        |           |         |              |
| 6        | Soil problems                    |              |             |        |           |         |              |
| 7        | Crops pests                      |              |             |        |           |         |              |
| 8        | Animal diseases                  |              |             |        |           |         |              |
| 9        | Irrigation problem               |              |             |        |           |         |              |
| 10       | Riverbank erosion                |              |             |        |           |         |              |

2. Does drought damage your crops production and agricultural income? If yes, then how \_\_\_\_\_

3. Does flood and riverbank erosion damage your livelihoods and agricultural sector? If yes, then how does it effect on?

---



---

4. Do extreme temperatures and heat waves influence your farming field? If yes, then how severely affects your production? \_\_\_\_\_

#### **D. Perceived impacts of climate change on crops production**

1. How adversely below these climate change impacts are effects on your crops? Please mention of your valuable opinion.

| Sl no | perception                                                                                                                                                   | Likert scale    |                       |                   |                      |                           |
|-------|--------------------------------------------------------------------------------------------------------------------------------------------------------------|-----------------|-----------------------|-------------------|----------------------|---------------------------|
|       |                                                                                                                                                              | 1. To no extent | 2. To a little extent | 3. To some extent | 4. To a great extent | 5. To a very great extent |
| 01    | What do you think about how intensely climate change has increased in scarcity of water for crops production?                                                |                 |                       |                   |                      |                           |
| 02    | Do you think due to climate change the frequency of crop diseases has increased?                                                                             |                 |                       |                   |                      |                           |
| 03    | Does climate change impacts largely reducing your crops yields?                                                                                              |                 |                       |                   |                      |                           |
| 04    | What do you think that the crops have been increasingly stressed by drought conditions due to climate change?                                                |                 |                       |                   |                      |                           |
| 05    | What do you think the climate-extreme events have risen the pest incidence?                                                                                  |                 |                       |                   |                      |                           |
| 06    | What do you think that the timing of crops planting has been very irregular in recent years due to climatic variability?                                     |                 |                       |                   |                      |                           |
| 07    | What do you think that the extreme climatic events intensely losses of your farm income or farming earnings?                                                 |                 |                       |                   |                      |                           |
| 08    | What is your perception about how much soil condition has become unsuitable for planting due to climate change?                                              |                 |                       |                   |                      |                           |
| 09    | How harshly climate change influenced a drastic decline in the sale of farm Products                                                                         |                 |                       |                   |                      |                           |
| 10    | How much the harvesting of crops has become prolonged due to climate change                                                                                  |                 |                       |                   |                      |                           |
| 11    | What do you think that the how forcefully quality crops have become increasingly difficult to produce due to extreme climatic events and climate variability |                 |                       |                   |                      |                           |

**E. Farmers perception on adaptation responses toward climate change**

1. What types of adaptation measures are you taking to protecting the crops from climate change impacts? Mention it, please.

---

---

---

2. Which types of strategies are you adopting to cope with climate change? Mention it, please.

---

---

**F. Constraints to climate change adaptation**

1. What do you think that lack of information and knowledge works as a barrier to climate change adaptation? 1. Yes 0. No

2. Does credit accessibility influence taken adaption measures? 1. Yes 0. No

3. Does the using technology (like mobile, TV, radio, etc.) influence adopting adaptation measures? 1. Yes 0. No

4. What do you think about the Government /NGO/others' support influences adopting adaptation strategies? 1. Yes 0. No

5. Do you think? Scarcity of water during the dry season influences taken adaptation measures? 1. Yes, 2. No

**Thank you for your supports**
