# Supplementary material for: Smallholder Farmers’ Perceived Climate-Related Risk, Impact, and Their Choices of Sustainable Adaptation Strategies
Source: MDPI journal article supplement (doi:10.3390/su132111922), 2021-10-28
Supplement: s1 [file s1]

Archive with 1 entries (1 files):
- sustainability-1410406-supplementary.pdf
